# Supplementary material
Source: Springer Nature journal article supplement (https://www.springermedizin.de/resource/supplementary/12891_2009_829_MOESM1_ESM.pdf/9507114)
Supplement: MOESM1 [file 9507114]

## Low-binding plate for inhibition step

Dilute samples and prepare titration of standards

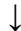

Mix the sample/standards with a constant amount of a labeled antibody

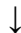

Incubate until antigen-antibody binding equilibrium is reached

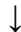

Transfer to coated and blocked high-binding plate →

## High-binding plate for ELISA

Coat wells with the antigen

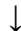

Block coated wells

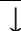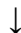

Incubate to allow binding of antibody left free in the inhibition mixture to the antigen coated to wells

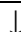

Remove the inhibition mixture with the antibody bound to the antigen in the sample

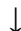

Add a reagent (streptavidin-enzyme for antibody labeled with biotin) to detect labeled antibody bound to the antigen coated to wells

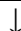

Add a chromogenic substrate for the enzyme



Read color which is inversely proportional to the content of the antigen in the sample
